# Supplementary material for: Distinct Roles of IL-1β and IL-18 in NLRC4-Induced Autoinflammation
Source: PubMed Central journal article supplement (PMC7592392; doi:10.3389/fimmu.2020.591713), 2020-10-14

# Supplementary Figure 1

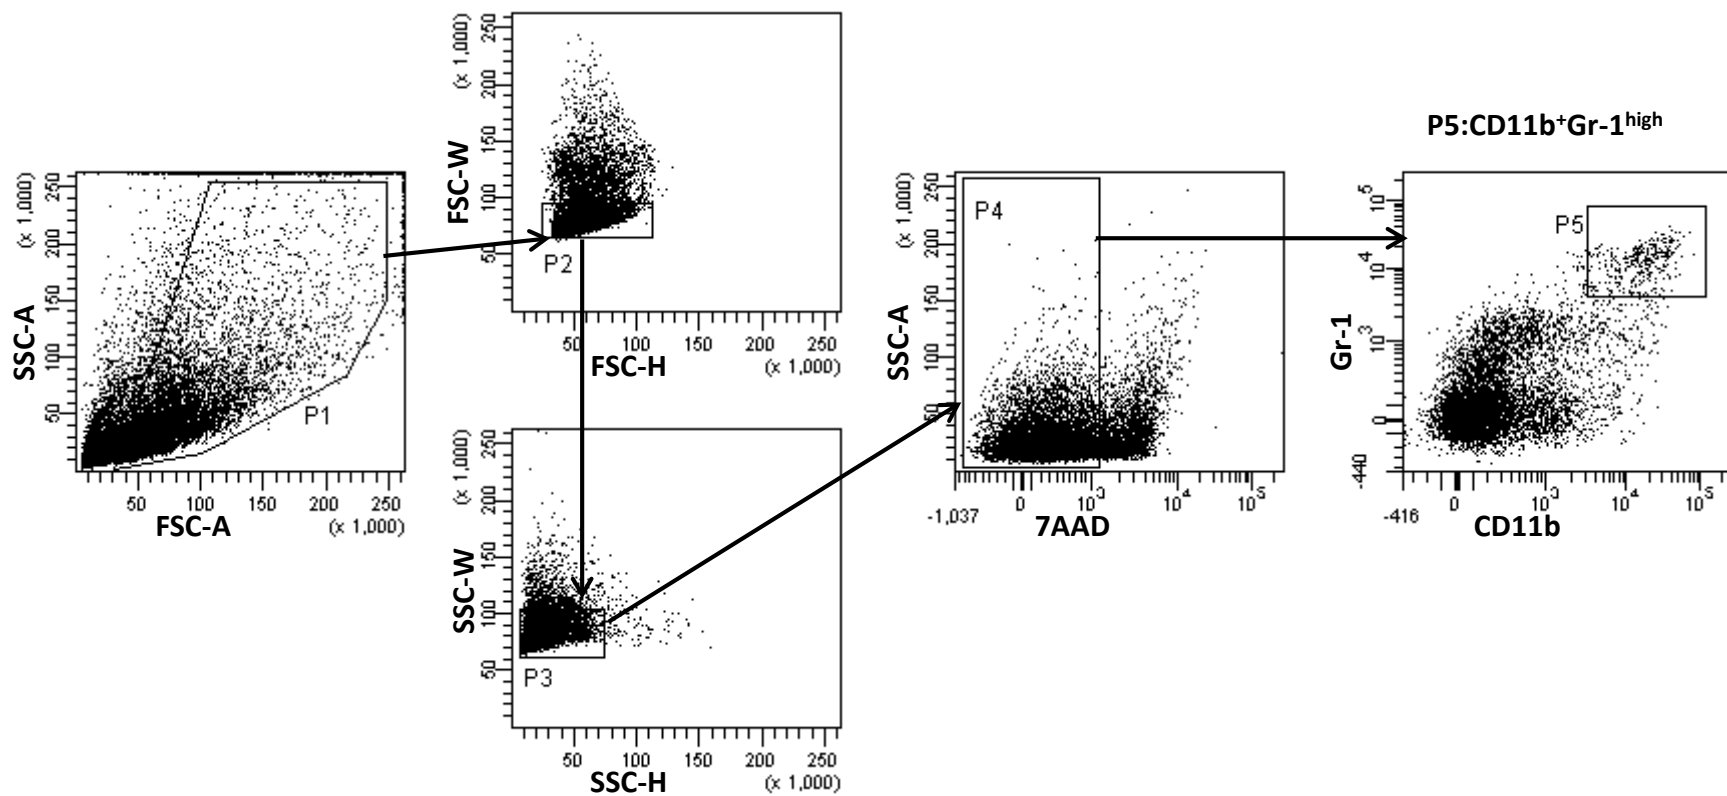

Supplement: DataSheet_1.pdf [file DataSheet_1.pdf]
